# Supplementary material
Source: ML conference proceedings conference paper supplement (https://proceedings.neurips.cc/paper_files/paper/2019/hash/1b486d7a5189ebe8d8c46afc64b0d1b4-Abstract.html)
Supplement: Supplementary file 1 [file 1b486d7a5189ebe8d8c46afc64b0d1b4-Supplemental.zip]

Archive with 1 entries (1 files):
- Fairness_via_Disentanglement.pdf
